# Supplementary material for: Population Response of Rhizosphere Microbiota of Garden Pea Genotypes to Inoculation with Arbuscular Mycorrhizal Fungi
Source: Int J Mol Sci. 2023 Jan 6;24(2):1119. doi: 10.3390/ijms24021119 (PMC9866347; doi:10.3390/ijms24021119)
Supplement: Supplementary file 1 [file ijms-24-01119-s001.zip › Suplement 1_data-Table S1.xlsx]

## Sheet: Sheet1
S1. Experimental data set obtained from two independent biological replicates of the experiment - Population density of the investigated trophic groups of microorganisms [CFU/g absolute dry soil (a.d.s.)] at the rhizosphere communities of the garden pea cultivars
A1. Population density of Micromycetes									B1. Population density of Actinomycetes
density/treatments	genotypes -“Normal" leaf type			genotypes -"Affila" leaf type					density/treatments	genotypes -“Normal" leaf type			genotypes -"Affila" leaf type
	cvr. Marsi	cvr. Plovdiv	cvr. 22-11n	cvr. 22-11af	cvr. Kazino	cvr. Echo				cvr. Marsi	cvr. Plovdiv	cvr. 22-11n	cvr. 22-11af	cvr. Kazino	cvr. Echo
1st biological repetition									1st biological repetition
Control - not treated	14811.2	23333.3	20900.1	2102.13	9058.44	7500.85			Control - not treated	378787879	418410042	33762058	14492754	381081081	250000000
Mono-mycorrhizal (mM)	12195.6	14634.6	5941.54	9449.39	4935.89	2778.88			Mono-mycorrhizal (mM)	48780488	97560976	4411765	3806375	26666666	46296297
Poly-mycorrhizal (pM)	13986.4	18182.2	9267.91	10625.7	5949.27	4478.79			Poly-mycorrhizal (pM)	99860140	163636364	3080082	8037810	76250000	69253731
2nd biological repetition									2nd biological repetition
Control - not treated	24721.9	38910.5	23282.9	23866.3	22052.9	24910.2			Control - not treated	8.15822e+07	2.6087e+07	5.37634e+07	6.1674e+07	4.038e+07	3.6036e+07
Mono-mycorrhizal (mM)	4291.85	18985.5	13980.8	11764.7	13444.8	15015			Mono-mycorrhizal (mM)	1.51515e+07	1.75097e+07	1.97905e+07	4.68562e+07	1.07399e+07	2.99401e+07
Poly-mycorrhizal (pM)	11655	17662.5	15842.3	19753	16029.9	13020.8			Poly-mycorrhizal (pM)	3.16166e+07	1.93638e+07	2.63789e+07	3.68239e+07	1.29412e+07	23437500
average									average
Control - not treated	19766.6	31121.9	22091.5	12984.2	15555.6	16205.5			Control - not treated	2.30185e+08	2.22248e+08	4.37627e+07	3.80834e+07	2.10731e+08	1.43018e+08
Mono-mycorrhizal (mM)	8243.72	16810.1	9961.18	10607	9190.36	8896.95			Mono-mycorrhizal (mM)	3.1966e+07	5.75354e+07	1.21011e+07	2.53313e+07	1.87033e+07	3.81182e+07
Poly-mycorrhizal (pM)	12820.7	17922.4	12555.1	15189.3	10989.6	8749.81			Poly-mycorrhizal (pM)	6.57384e+07	9.15001e+07	1.47295e+07	2.24309e+07	4.45956e+07	4.63456e+07
A2. Two-factor analysis of variance									B2. Two-factor analysis of variance
	A(genotypes)	B (AM symbiosis)	A x B (genotypes x AM symbiosis)	X (factorial)	Z (random) – from unorganized factors	Y (total)				A(genotypes)	B (AM symbiosis)	A x B (genotypes x AM symbiosis)	X (factorial)	Z (random) – from unorganized factors	Y (total)
variance (C)	1.24418e+08	7.37517e+08	2.97178e+07	8.91652e+08	1.12022e+09	2.01187e+09			variance(C)	3697040486454144	9.6617e+16	1204184991484288	1.01518e+17	3.08916e+17	4.10434e+17
impact force (Ƞx^2)	0.0618419	0.366583	0.0147713	0.443196	0.556804	1			impact force (Ƞx^2)	0.00900763	0.235402	0.00293393	0.247343	0.752657	1
degrees of freedom (DF)	1	2	2	5	30	35			degrees of freedom (DF)	1	2	2	5	30	35
Standard Deviation (SD)	1.24418e+08	3.68758e+08	1.48589e+07	1.7833e+08	3.73405e+07	5.74819e+07			Standard Deviation (SD)	3697040486454144	4.83085e+16	602092495742144	2.03036e+16	1.02972e+16	1.17267e+16
Fisher's test (F)	3.33198	9.87556	0.39793	4.77579	1	1.5394			Fisher's test (F)	0.359034	4.69142	0.0584715	1.97176	1	1.13882
F tab.	0.9	0.95	0.99						F tab.	0.9	0.95	0.99
	2.049	2.534	3.699							2.049	2.534	3.699
error of the force of AnB	0.0371202								error of the force of AnB	0.0501771
error of the power of factorial Х	0.0928006								error of the power of factorial Х	0.125443
C1. Population density of Ammonifying bacteria									D1. Population density of Assimilating mineral (NH4+) nitrogen bacteria
density/treatments	genotypes -“Normal" leaf type			genotypes -"Affila" leaf type					density/treatments	genotypes -“Normal" leaf type			genotypes -"Affila" leaf type
	cvr. Marsi	cvr. Plovdiv	cvr. 22-11n	cvr. 22-11af	cvr. Kazino	cvr. Echo				cvr. Marsi	cvr. Plovdiv	cvr. 22-11n	cvr. 22-11af	cvr. Kazino	cvr. Echo
1st biological repetition									1st biological repetition
Control - not treated	675675676	576439791	54662379	58550725	840579710	728155340			Control - not treated	540540541	863598326	92893891	83333333	635135135	775000000
Mono-mycorrhizal (mM)	9216783216	1.56545e+10	214989733	181277705	29565217391	1068932039			Mono-mycorrhizal (mM)	3426573426	6763636363	170431211	39960887	218750000	50746269
Poly-mycorrhizal (pM)	12439024330	1.46806e+10	269117647	178247995	2.14493e+10	1249514563			Poly-mycorrhizal (pM)	1512195121	4146341463	192647059	24627613	226666666	42777778
2nd biological repetition									2nd biological repetition
Control - not treated	763281485	624568902	60901285	52748284	98262489	665931220			Control - not treated	687239451	920000000	101222645	98294522	825841649	542938461
Mono-mycorrhizal (mM)	13485332862	9333333333	464581394	188888888	108396483	1021457311			Mono-mycorrhizal (mM)	1120381111	1694666666	151328729	49378582	348685420	61294756
Poly-mycorrhizal (pM)	11790928666	10942864495	479880200	139207100	110328186	1089249659			Poly-mycorrhizal (pM)	972754328	1285392647	128448888	51374395	279381222	38362928
average									average
Control - not treated	7.19479e+08	6.00504e+08	57781832	5.56495e+07	4.69421e+08	697043280			Control - not treated	613889996	891799163	97058268	9.08139e+07	730488392	6.58969e+08
Mono-mycorrhizal (mM)	11351058039	1.24939e+10	3.39786e+08	1.85083e+08	14836806937	1045194675			Mono-mycorrhizal (mM)	2.27348e+09	4.22915e+09	160879970	4.46697e+07	283717710	5.60205e+07
Poly-mycorrhizal (pM)	12114976498	1.28117e+10	3.74499e+08	1.58728e+08	1.07798e+10	1169382111			Poly-mycorrhizal (pM)	1.24247e+09	2715867055	1.60548e+08	38001004	253023944	40570353
C2. Two-factor analysis of variance									D2. Two-factor analysis of variance
	A(genotypes)	B (AM symbiosis)	A x B (genotypes x AM symbiosis)	X (factorial)	Z (random) – from unorganized factors	Y (total)				A(genotypes)	B (AM symbiosis)	A x B (genotypes x AM symbiosis)	X (factorial)	Z (random) – from unorganized factors	Y (total)
variance(C)	5.12017e+19	2.93048e+20	2.87929e+19	3.73043e+20	1.48248e+21	1.85552e+21			variance(C)	1.15348e+19	2.70411e+18	6.39378e+18	2.06327e+19	4.42301e+19	6.48628e+19
impact force (Ƞx^2)	0.0275942	0.157933	0.0155174	0.201045	0.798955				impact force (Ƞx^2)	0.177834	0.0416897	0.0985739	0.318097	0.681903
degrees of freedom (DF)	1	2	2	5	30	35			degrees of freedom (DF)	1	2	2	5	30	35
Standard Deviation (SD)	5.12017e+19	1.46524e+20	1.43965e+19	7.46086e+19	4.9416e+19	5.30149e+19			Standard Deviation (SD)	1.15348e+19	1.35206e+18	3.19689e+18	4.12654e+18	1.47434e+18	1.85322e+18
Fisher's test (F)	1.03614	2.96511	0.291332	1.50981	1	1.07283			Fisher's test (F)	7.82371	0.917061	2.16836	2.79891	1	1.25699
F tab.	0.9	0.95	0.99						F tab.	0.9	0.95	0.99
	2.049	2.534	3.699							2.049	2.534	3.699
error of the force of AnB	0.0532637								error of the force of AnB	0.0454602
error of the power of factorial Х	0.133159								error of the power of factorial Х	0.11365
E1. Population density of Phosphate - solubilizing bacteria									D1. Population density of Azotobacter bacteria
density/treatments	genotypes -“Normal" leaf type			genotypes -"Affila" leaf type					density/treatments	genotypes -“Normal" leaf type			genotypes -"Affila" leaf type
	cvr. Marsi	cvr. Plovdiv	cvr. 22-11n	cvr. 22-11af	cvr. Kazino	cvr. Echo				cvr. Marsi	cvr. Plovdiv	cvr. 22-11n	cvr. 22-11af	cvr. Kazino	cvr. Echo
1st biological repetition									1st biological repetition
Control - not treated	4.94438e+06	3.89105e+06	2.10132e+06	4423749	5.48926e+06	4083832			Control - not treated	9.88875e+06	1.94553e+07	3.49243e+06	9.76211e+06	1.67064e+07	3.14371e+07
Mono-mycorrhizal (mM)	5.86552e+07	5.07246e+07	2.43885e+07	2.67559e+07	28529411	1.8015e+07			Mono-mycorrhizal (mM)	2.28898e+07	3.47826e+07	1.39808e+07	1.51672e+07	4.23529e+07	7.95796e+07
Poly-mycorrhizal (pM)	2.28205e+07	4.82019e+07	3.34528e+07	1.15075e+07	21876482	13718750			Poly-mycorrhizal (pM)	6.17716e+07	2.48963e+07	1.31422e+07	1.86881e+07	5.46318e+07	54687500
2nd biological repetition									2nd biological repetition
Control - not treated	7385220	4852941	3920472	5831111	9463622	6824735			Control - not treated	11228459	20000000	8888888	11111111	18000000	26584810
Mono-mycorrhizal (mM)	67413793	24303797	19722222	10890052	59420289	35689437			Mono-mycorrhizal (mM)	22382333	28965321	21333333	27341200	65333893	67322813
Poly-mycorrhizal (pM)	32931862	42842842	36418526	10224090	38275593	31222222			Poly-mycorrhizal (pM)	36222222	25948733	18452922	22947851	56222222	52738119
average									average
Control - not treated	6.1648e+06	4.372e+06	3.0109e+06	5127430	7.47644e+06	5.45428e+06			Control - not treated	1.05586e+07	1.97276e+07	6.19066e+06	1.04366e+07	1.73532e+07	2.9011e+07
Mono-mycorrhizal (mM)	6.30345e+07	3.75142e+07	2.20554e+07	1.8823e+07	43974850	2.68522e+07			Mono-mycorrhizal (mM)	2.26361e+07	3.1874e+07	1.76571e+07	2.12542e+07	5.38434e+07	7.34512e+07
Poly-mycorrhizal (pM)	2.78762e+07	4.55224e+07	3.49357e+07	1.08658e+07	3.0076e+07	22470486			Poly-mycorrhizal (pM)	4.89969e+07	2.54225e+07	1.57975e+07	1.57975e+07	5.5427e+07	5.37128e+07
E2. Two-factor analysis of variance									D2. Two-factor analysis of variance
	A(genotypes)	B (AM symbiosis)	A x B (genotypes x AM symbiosis)	X (factorial)	Z (random) – from unorganized factors	Y (total)				A(genotypes)	B (AM symbiosis)	A x B (genotypes x AM symbiosis)	X (factorial)	Z (random) – from unorganized factors	Y (total)
variance(C)	598055545991972	5990452773786564	443375810012924	7031884129791460	4613145427261100	1.1645e+16			variance(C)	956624571268952	5258951458176000	64445569812912	6280021599257864	9342679096116608	1.56227e+16
impact force (Ƞx^2)	0.0513572	0.514421	0.0380743	0.603853	0.396147				impact force (Ƞx^2)	0.061233	0.336622	0.00412512	0.401981	0.598019
degrees of freedom (DF)	1	2	2	5	30	35			degrees of freedom (DF)	1	2	2	5	30	35
Standard Deviation (SD)	598055545991972	2995226386893282	221687905006462	1406376825958292	1.53772e+14	3.32715e+14			Standard Deviation (SD)	956624571268952	2629475729088000	32222784906456	1.256e+15	3.11423e+14	4.46363e+14
Fisher's test (F)	3.88925	19.4784	1.44167	9.14589	1	2.1637			Fisher's test (F)	3.07179	8.44343	0.10347	4.03312	1	1.4333
F tab.	0.9	0.95	0.99						F tab.	0.9	0.95	0.99
	2.049	2.534	3.699							2.049	2.534	3.699
error of the force of AnB	0.0264098								error of the force of AnB	0.039868
error of the power of factorial Х	0.0660245								error of the power of factorial Х	0.0996699
F1. Population density of Rhizobium bacteria									G1. AMF colonization (%)
density/treatments	genotypes -“Normal" leaf type			genotypes -"Affila" leaf type					density/treatments	genotypes -“Normal" leaf type			genotypes -"Affila" leaf type
	cvr. Marsi	cvr. Plovdiv	cvr. 22-11n	cvr. 22-11af	cvr. Kazino	cvr. Echo				cvr. Marsi	cvr. Plovdiv	cvr. 22-11n	cvr. 22-11af	cvr. Kazino	cvr. Echo
1st biological repetition	741657	1.15942e+06	932829	1.97357e+06	1.53532e+06	1.2012e+06			1st biological repetition
Control - not treated	2.43205e+06	2.33463e+06	1.31894e+06	1.44928e+06	470588	1.0479e+06			Control - not treated	8	16.76	16.09	23.75	12.37	10.68
Mono-mycorrhizal (mM)	2.0979e+06	691563	1.07527e+06	1.95627e+06	768883	651042			Mono-mycorrhizal (mM)	18.28	29.21	25	31.25	28.3	22.22
Poly-mycorrhizal (pM)									Poly-mycorrhizal (pM)	20.55	32.95	20.27	47.69	31.17	28.97
2nd biological repetition									2nd biological repetition
Control - not treated	439222	880128	472610	946927	673572	888888			Control - not treated	12.8	18.69	15.57	22.12	24.68	21.92
Mono-mycorrhizal (mM)	1284928	1089632	787382	700000	492584	642457			Mono-mycorrhizal (mM)	25.3	31.45	28.42	37.65	41.13	45.44
Poly-mycorrhizal (pM)	957677	1666666	680463	721395	598324	693822			Poly-mycorrhizal (pM)	23.33	35.33	26.18	34.82	38.29	44.44
average									average
Control - not treated	590439	1.01977e+06	702719	1.46025e+06	1.10445e+06	1.04504e+06			Control - not treated	10.4	17.73	15.83	22.94	18.53	16.3
Mono-mycorrhizal (mM)	1.85849e+06	1.71213e+06	1.05316e+06	1.07464e+06	481586	845181			Mono-mycorrhizal (mM)	21.79	30.33	26.71	34.45	34.72	33.83
Poly-mycorrhizal (pM)	1.52779e+06	1.17911e+06	877866	1.33883e+06	683604	672432			Poly-mycorrhizal (pM)	21.94	34.14	23.23	41.26	34.73	36.71
D2. Two-factor analysis of variance									G2. Two-factor analysis of variance
	A(genotypes)	B (AM symbiosis)	A x B (genotypes x AM symbiosis)	X (factorial)	Z (random) – from unorganized factors	Y (total)				A(genotypes)	B (AM symbiosis)	A x B (genotypes x AM symbiosis)	X (factorial)	Z (random) – from unorganized factors	Y (total)
variance(C)	5.95712e+11	2.3334e+11	2.31728e+12	3.14634e+12	6.72379e+12	9.87012e+12			variance(C)	565.726	1630.17	63.9683	2259.86	1213.43	3473.29
impact force (Ƞx^2)	0.0603551	0.023641	0.234778	0.318774	0.681226				impact force (Ƞx^2)	0.162879	0.469344	0.0184172	0.65064	0.34936	1
degrees of freedom (DF)	1	2	2	5	30	35			degrees of freedom (DF)	1	2	2	5	30	35
Standard Deviation (SD)	5.95712e+11	1.1667e+11	1.15864e+12	6.29267e+11	2.24126e+11	2.82003e+11			Standard Deviation (SD)	565.726	815.084	31.9841	451.973	40.4476	99.2369
Fisher's test (F)	2.65793	0.520554	5.1696	2.80765	1	1.25824			Fisher's test (F)	13.9866	20.1516	0.790754	11.1743	1	2.45347
F tab.	0.9	0.95	0.99						F tab.	0.9	0.95	0.99
	2.049	2.534	3.699							2.049	2.534	3.699
error of the force of AnB	0.0454151								error of the force of AnB	0.0232907
error of the power of factorial Х	0.113538								error of the power of factorial Х	0.0582267
